# Supplementary material for: Life’s Essential 8 for carotid artery stenosis prevention: stratified risk reduction by family cardiovascular history in the UK Biobank
Source: Research Square preprint supplement (doi:10.21203/rs.3.rs-6332879/v1), 2025-05-09
Supplement: Supplementary file 1 [file b370ca56c031eeedd2a06123.docx]

**Life’s Essential 8 for carotid artery stenosis prevention: stratified risk reduction by family cardiovascular history in the UK Biobank**

**Supplementary materials**

**Table S1.** Disease definitions used in the UK Biobank study

**Table S2.** Covariate definitions

**Table S3.** The percentages of participants with missing covariates

**Table S4.** Detailed description of the 8 components in LE8

**Table S5**. Stratified analysis of the association between the Life’sEssential8 score and Carotid Artery Stenosis incidence

**Table S6**. The result of Population Attributable Risk (PAR), representing the proportion of outcomes attributable to the exposure

**Table S7**. The result of Logistic Regression Analysis for Family Risk Score Development

**Table S8**.Main analysis on the association of the Family Risk Score and Carotid Artery Stenosis incidence

**Table S9**.Sensitivity analysis 1 on the association of the Life’sEssential8 score and Carotid Artery Stenosis incidence by excluding events that occurred within the first two years of follow-up

**Table S10** Sensitivity analysis 2 on the association between the Life’s Essential 8 score and Carotid Artery Stenosis incidence among participants, excluding Family Risk Score (revised inclusion and exclusion criteria)

**Table S11**.Sensitivity analysis 3 on the association between the Life’s Essential 8 score and Carotid Artery Stenosis incidence among participants, excluding those with missing values in covariates

**Figure S1.** Selection of study participants in the UK Biobank Cohort

**Figure S2.** Distribution of Life’s Essential 8 (LE8) Overall Scores and Individual Components in 270,695 UK Biobank Participants

**Figure S3.**Frequency of Family Risk Scores by Risk Category

**Figure S4**.Association of total LE8, behavior subscale score and biological subscale score with Carotid Artery Stenosis: Hazard Ratios and 95% Confidence Intervals

**Figure S5**.Crude cumulative incidence of CAS by different family risk level

**Table S1.** Disease definitions used in the UK Biobank study

|  | **ICD-9 (Field ID: 41271)** | **ICD-10 (Field ID: 41270)** |
| --- | --- | --- |
| CVD | 390-459 | I00-I99 |
| CAS | 433.10 | I65.2 |

Variable definitions constructed using ICD-9 and ICD-10 fields with choice-, disease- or procedure-specific codes between brackets are shown.CVD, cardiovascular disease; CAS, Carotid Artery Stenosis;

**Table S2.** Covariate definitions

| **Variable** | **Definition** | **UK Biobank field ID** |
| --- | --- | --- |
| Age | Continuous | 21022 |
| Sex | Female/Male | 31 |
| Ethnicity | White/Other | 21000 |
| Townsend deprivation index | Continuous | 22189 |
| Alcohol drinker status | Never/Previous/Current | 20117 |
| Education level | No qualification/Any other qualification/Degree or above | 6138 |
| Income level | ≥£18,000/<£18000 | 738 |
| Employment | Employed/Unemployed | 6142 |
| Use of medication | Yes/No | 6177,6153 |
| Sedentary time | Continuous;hour | 1070,1080,1090 |

**Table S3. The percentages of participants with missing covariates**

| **Covariates** | **Percentage of missing data** | |
| --- | --- | --- |
| Sex | 0.94% | |
| Age | 0.00% | |
| Ethnicity | 0.25% | |
| Townsend deprivation index | 0.12% | |
| Alcohol drinker status | 0.04% | |
| Education level | 0.58% | |
| Income level | 11.45% | |
| Employment | 0.71% | |
| Medication use | 0.44% | |
| Sedentary time | 0.01% | |
| Overall 3.47% | |

**Table S4. Detailed description of the 8 components in LE8.**

| **Health factors** | **Method of measurement** | **Quantification of CVH metric** | |
| --- | --- | --- | --- |
| **DASH diet** | Self-reported daily intake of a DASH-style eating pattern.Self-reported healthy eating pattern: enough intake of fruit, vegetable, whole grains, fish, dairy, and vegetable oils, small proportion of refined grains, processed meats, unprocessed meats, sugar sweetened beverages, industrial trans-fat, and added sodium. | Points | DASH diet score ((Population) |
| 100 | 95th percentile (top/ideal diet) |
| 80 | 75th-94th percentile |
| 50 | 50th-74th percentile |
| 25 | 25th-49th percentile |
| 0 | 1st-24th percentile (bottom/least ideal quartile) |
| **Physical activity** | Self-reported minutes of moderate or vigorous physical activity per week. One minute of vigorous physical activity is equivalent to two minutes of moderate physical activity. | Points | Minutes of moderate- (or greater) intensity activity per week |
| 100 | ≥150 minutes |
| 90 | 120-149 minutes |
| 80 | 90-119 minutes |
| 60 | 60-89 minutes |
| 40 | 30-59 minutes |
| 20 | 1-29 minutes |
| 0 | 0 minutes |
| **Nicotine exposure** | Self-reported use of cigarettes, secondhand smoke exposure. | Points | Combustible tobacco uses or secondhand smoke exposure |
| 100 | Never smoker |
| 80 | Former smokers with quit years ≥ 5 |
| 50 | Former smokers with quit years 1-5 |
| 25 | Former smokers with quit years < 1 |
| 0 | Current smoker |
| Subtract 20 points (unless score is 0) for secondhand smoke exposures. | |
| **Sleep health** | Self-reported average hours of sleep per night. | Points | Average hours of sleep per night |
| 100 | ≥ 7 and < 9 hours |
| 90 | ≥ 9 and < 10 hours |
| 70 | ≥ 6 and < 7 hours |
| 40 | ≥ 5 and < 6 or ≥ 10 hours |
| 20 | ≥ 4 and < 5 hours |
| 0 | < 4 hours |
| **Body mass index** | Body weight (kilograms) divided by height squared (meters squared). | Points | BMI |
| 100 | <25 kg/m2 |
| 70 | 25.0-29.9 kg/m2 |
| 30 | 30.0-34.9 kg/m2 |
| 15 | 35.0-39.9 kg/m2 |
| 0 | ≥40 kg/m2 |
| **Blood lipids** | Non-HDL cholesterol was calculated by total cholesterol minus HDL cholesterol. Serum cholesterol was measured enzymatically | Points | Non-HDL-cholesterol |
| 100 | <130 mg/dL |
| 60 | 130-159 mg/dL |
| 40 | 160-189 mg/dL |
| 20 | 190-219 mg/dL |
| 0 | ≥220 mg/dL |
| If drug-treated level, subtract 20 points (unless score is 0). | |
| **Blood glucose** | HbA1c was measured by high-performance liquid chromatography methods. | Points | HbA1c |
| 100 | Diabetes with HbA1c <7.0 % |
| 75 | Diabetes with HbA1c 7.0%-7.9% |
| 50 | Diabetes with HbA1c 8.0%-8.9% |
| 25 | Diabetes with HbA1c 9.0%-9.9% |
| 0 | Diabetes with HbA1c ≥10% |
| **Blood pressure** | The average of all available BP measurements was used to calculate systolic and diastolic BP. | Points | Systolic and diastolic BPs |
| 100 | SBP < 120 and DBP < 80 mm Hg |
| 75 | 120 ≤ SBP < 130 and DBP<80 mm Hg |
| 50 | 130 ≤ SBP < 140 or 80 ≤ DBP < 90 mm Hg |
| 25 | 140 ≤ SBP < 150 or 90 ≤ DBP < 100 mm Hg |
| 0 | SBP ≥ 150 or DBP ≥ 100 mm Hg |
| Subtract 20 points (unless score is 0) if treated level | |

**Table S5. Stratified analyses for association between Life’s Essential 8 and hazard of CAS among participants a**

| Subgroup | HR (95% CI) | | | P for trend | P for interaction**c** |
| --- | --- | --- | --- | --- | --- |
| Low-CVH | Moderate-CVH | High-CVH |
| Overall | 1.00(reference) | 0.64 (0.55-0.76)**b** | 0.40 (0.30-0.55) | <0.001 |  |
| Age |  |  |  |  | 0.001 |
| ≤50 years | 1.00 (reference) | 0.52 (0.30, 0.90) | 0.18 (0.05, 0.64) | 0.006 |  |
| 51–60 years | 1.00 (reference) | 0.49 (0.37, 0.65) | 0.30 (0.16, 0.55) | <0.001 |  |
| >60 years | 1.00 (reference) | 0.79 (0.63, 0.98) | 0.55 (0.37, 0.80) | 0.005 |  |
| Sex |  |  |  |  | 0.592 |
| Male | 1.00 (reference) | 0.66 (0.54, 0.80) | 0.36 (0.24, 0.55) | <0.001 |  |
| Female | 1.00 (reference) | 0.62 (0.47, 0.83) | 0.48 (0.30, 0.77) | 0.003 |  |
| Ethnicity |  |  |  |  | 0.668 |
| White | 1.00 (reference) | 0.63 (0.54, 0.75) | 0.40 (0.29, 0.55) | <0.001 |  |
| Other | 1.00 (reference) | 0.96 (0.40, 2.29) | 0.51 (0.10, 2.61) | 0.418 |  |
| Townsend deprivation index |  |  |  |  | 0.701 |
| ≥ median | 1.00 (reference) | 0.67 (0.54, 0.83) | 0.47 (0.31, 0.71) | <0.001 |  |
| ＜median | 1.00 (reference) | 0.61 (0.47, 0.80) | 0.35 (0.22, 0.55) | <0.001 |  |
| Education |  |  |  |  | 0.212 |
| No qualification | 1.00 (reference) | 0.62 (0.47, 0.82) | 0.18 (0.07, 0.51) | 0.002 |  |
| Any other qualification | 1.00 (reference) | 0.64 (0.50, 0.80) | 0.41 (0.26, 0.64) | <0.001 |  |
| Degree or above | 1.00 (reference) | 0.81 (0.52, 1.27) | 0.60 (0.34, 1.09) | <0.001 |  |
| Income |  |  |  |  | 0.716 |
| <18,000 | 1.00 (reference) | 0.68 (0.56, 0.84) | 0.40 (0.26, 0.61) | <0.001 |  |
| ≥18,000 | 1.00 (reference) | 0.59 (0.44, 0.78) | 0.41 (0.26, 0.65) | <0.001 |  |
| Employment |  |  |  |  | 0.513 |
| Employed | 1.00 (reference) | 0.64 (0.49, 0.84) | 0.29 (0.17, 0.51) | <0.001 |  |
| Unemployed | 1.00 (reference) | 0.65 (0.53, 0.80) | 0.49 (0.34, 0.72) | <0.001 |  |
| Use of medication |  |  |  |  | 0.714 |
| No | 1.00 (reference) | 0.53 (0.41, 0.70) | 0.32 (0.21, 0.50) | <0.001 |  |
| Yes | 1.00 (reference) | 0.72 (0.59, 0.88) | 0.52 (0.33, 0.83) | 0.013 |  |
| Alcohol drinker status |  |  |  |  | 0.809 |
| Never | 1.00 (reference) | 1.01 (0.39, 2.59) | 0.43 (0.08, 2.28) | 0.257 |  |
| Previous | 1.00 (reference) | 0.80 (0.43, 1.50) | 0.36 (0.08, 1.65) | 0.242 |  |
| Current | 1.00 (reference) | 0.62 (0.52, 0.74) | 0.40 (0.29, 0.56) | <0.001 |  |
| Family risk level |  |  |  |  | 0.315 |
| Low risk | 1.00 (reference) | 0.87 (0.59, 1.29) | 0.59 (0.32, 1.07) | 0.133 |  |
| Medium risk | 1.00 (reference) | 0.71 (0.52, 0.96) | 0.42 (0.24, 0.73) | 0.002 |  |
| High risk | 1.00 (reference) | 0.54 (0.43, 0.67) | 0.33 (0.20, 0.54) | <0.001 |  |

**a**Obtained by using multivariable Cox regression model.

**b**Hazard ratios (95% confidence interval) (all such values).

**c**P for interaction was calculated by adding the cross-product terms in the multivariable Cox model.

Model was additionally adjusted adjusted for age, sex, ethnicity, Townsend deprivation index, alcohol drinker status, sedentary time,average household income, education levels,medication use and family risk level.

**Table S6**. The result of Population Attributable Risk (PAR), representing the proportion of outcomes attributable to the exposure.

| Variable | Total No. of Participants | Incidence rate per person-years | PAR |
| --- | --- | --- | --- |
| LE8 score**a** | 270,695 | 1158/3,596,976 | 57.6% |
| Biological subscale score**b** | 270,695 | 1158/3,596,976 | 27.9% |
| Behavior subscale score**c** | 270,695 | 1158/3,596,976 | 31.9% |

**a**PAR for the LE8 score was adjusted for age, sex, ethnicity, Townsend deprivation index, alcohol drinker status, sedentary time,average household income, education levels,medication use and family risk level.

**b** PAR for the biological subscale score score was adjusted for age, sex, ethnicity, Townsend deprivation index, alcohol drinker status, sedentary time,average household income, education levels,medication use ,family risk level and behavior subscale score .

**c**PAR for the behavior subscale score was adjusted for age, sex, ethnicity, Townsend deprivation index, alcohol drinker status, sedentary time,average household income, education levels,medication use, family risk level and biological subscale score

**Table S7**. Logistic Regression Analysis for Family Risk Score Development.

| Variable i | OR (95%CI) | P-value | Weight i |
| --- | --- | --- | --- |
| Father heart disease history | 1.27 (1.17, 1.38) | <0.001 | 1 |
| Father stroke history | 1.11 (1.00, 1.24) | 0.046 | 1 |
| Father high blood pressure history | 0.95 (0.86, 1.04) | 0.266 | 0 |
| Father diabetes history | 0.83 (0.72, 0.95) | 0.01 | 1 |
| Mother heart disease history | 1.49 (1.37, 1.63) | <0.001 | 1 |
| Mother stroke history | 1.27 (1.15, 1.41) | <0.001 | 1 |
| Mother high blood pressure history | 0.88 (0.80, 0.95) | 0.002 | 1 |
| Mother diabetes history | 0.83 (0.72, 0.95) | 0.008 | 1 |
| Siblings heart disease history | 2.44 (2.20, 2.70) | <0.001 | 2 |
| Siblings stroke history | 2.44 (2.08, 2.85) | <0.001 | 2 |
| Siblings high blood pressure history | 1.59 (1.45, 1.74) | <0.001 | 2 |
| Siblings diabetes history | 1.52 (1.34, 1.71) | <0.001 | 2 |

**Table S8**.Main analysis on the association of the Family Risk Score and Carotid Artery Stenosis incidence

|  |  | Family Risk Score | | | P for trend | |
| --- | --- | --- | --- | --- | --- | --- |
|  |  | Low family risk | Medium family risk | High family risk |
| Total No. of participants | 270,695 | 94,978 | 88,197 | 87,520 |  |  |
| Incidence rate per person-years | 1158/3,596,975 | 286/1,266,454 | 362/1,172,410 | 510/1,158,111 |  |  |
| Crude model |  | 1.00(reference) | 1.37 (1.19,1.56) | 1.96 (1.77,2.17) | <0.0001 | |
| Model1 |  | 1.00 (reference) | 1.19 (1.02,1.39) | 1.56 (1.34,1.80) | <0.0001 | |
| Model2 |  | 1.00(reference) | 1.10 (0.94,1.28) | 1.25 (1.08,1.46) | <0.0001 | |
| Model3 |  | 1.00(reference) | 1.09 (0.93,1.28) | 1.24 (1.07,1.44) | <0.0001 | |

Crude model was unadjusted.

Model 1 was adjusted for age, sex, and ethnicity.
Model 2 was additionally adjusted for Townsend deprivation index, alcohol drinker status, medication using-sedentary time-average household income and education levels.

Model 3 was adjusted for age, sex, ethnicity, Townsend deprivation index, alcohol drinker status, sedentary time, average household income, education levels, medication use and LE8 score.

**Table S9**.Sensitivity analysis1 on the association of the Life’sEssential8 score and Carotid Artery Stenosis incidence by excluding events that occurred within the first two years of follow-up

|  |  | LE8 score | | | *P* for trend | |
| --- | --- | --- | --- | --- | --- | --- |
|  |  | Low-CVH | Moderate-CVH | High-CVH |
| Total No. of Participants | 270,614 | 21,210 | 213,008 | 36,369 |  |  |
| Incidence rate per person-years | 1077/3596894 | 158/275,464 | 868/2,831,141 | 51/490,289 |  |  |
| Crude model |  | 1.00(reference) | 0.53 (0.45,0.63) | 0.18 (0.13,0.24) | <0.0001 | |
| Model1 |  | 1.00 (reference) | 0.53 (0.45,0.63) | 0.27 (0.20,0.37) | <0.0001 | |
| Model2 |  | 1.00(reference) | 0.66 (0.55,0.78) | 0.40 (0.29,0.56) | <0.0001 | |
| Model3 |  | 1.00(reference) | | 0.66 (0.55,0.78) | | --- | | 0.41 (0.29,0.56) | <0.0001 | |

Model 1was adjusted for age, sex, and ethnicity.
Model 2 was additionally adjusted for Townsend deprivation index, alcohol drinker status, Medication using-sedentary time-average household income and education levels.

Model3was adjusted for age, sex, ethnicity, Townsend deprivation index, alcohol drinker status, sedentary time,average household income, education levels,medication use and family risk level.

**Table S10**.Sensitivity analysis 2 on the association between the Life’s Essential 8 score and Carotid Artery Stenosis incidence among participants, excluding Family Risk Score (revised inclusion and exclusion criteria）

|  |  | **LE8 score** | | | P for trend |
| --- | --- | --- | --- | --- | --- |
|  |  | Low-CVH | Moderate-CVH | High-CVH |
| Total No. of Participants | 362,997 | 30,353 | 287,134 | 45,510 |  |
| Incidence rate per person-years | 1684/4811548 | 271/392,402 | 1341/ 3,806,688 | 72/612,458 |  |
| Crude model |  | 1.00(reference) | 0.51 (0.44, 0.58) | 0.17 (0.13, 0.22) | <0.0001 |
| Model1 |  | 1.00 (reference) | 0.51 (0.45, 0.58) | 0.25 (0.19, 0.33) | <0.0001 |
| Model2 |  | 1.00(reference) | 0.62 (0.54,0.71) | 0.37 (0.28,0.48) | <0.0001 |

Crude model was unadjusted for any covariant.

Model 1 was adjusted for age, sex, and ethnicity.
Model 2 was additionally adjusted for Townsend deprivation index, alcohol drinker status, Medication using-sedentary time-average household income, and education levels.

**Table S11**.Sensitivity analysis 3 on the association between the Life’s Essential 8 score and Carotid Artery Stenosis incidence among participants, excluding those with missing values in covariates

|  |  | **LE8 score** | | | P for trend |
| --- | --- | --- | --- | --- | --- |
|  |  | Low-CVH | Moderate-CVH | High-CVH |
| Total No. of Participants | 222,943 | 17,425 | 175,118 | 30,400 |  |
| Incidence rate per person-years | 932/2967146 | 149/226,576 | 735/2,330,745 | 48/409,825 |  |
| Model1 |  | 1.00(reference) | 0.48 (0.40, 0.57) | 0.18 (0.13, 0.24) | <0.0001 |
| Model2 |  | 1.00 (reference) | 0.59 (0.49, 0.70) | 0.39 (0.28, 0.55) | <0.0001 |
| Model3 |  | 1.00(reference) | 0.59 (0.49, 0.70) | | 0.39 (0.28, 0.55) | | --- | | <0.0001 |

Model 1 was adjusted for age, sex, and ethnicity.
Model 2 was additionally adjusted for Townsend deprivation index, alcohol drinker status, Medication using-sedentary time-average household income, and education levels.

Model 3was adjusted for age, sex, ethnicity, Townsend deprivation index, alcohol drinker status, sedentary tim e,average household income, education levels,medication use and family risk level.


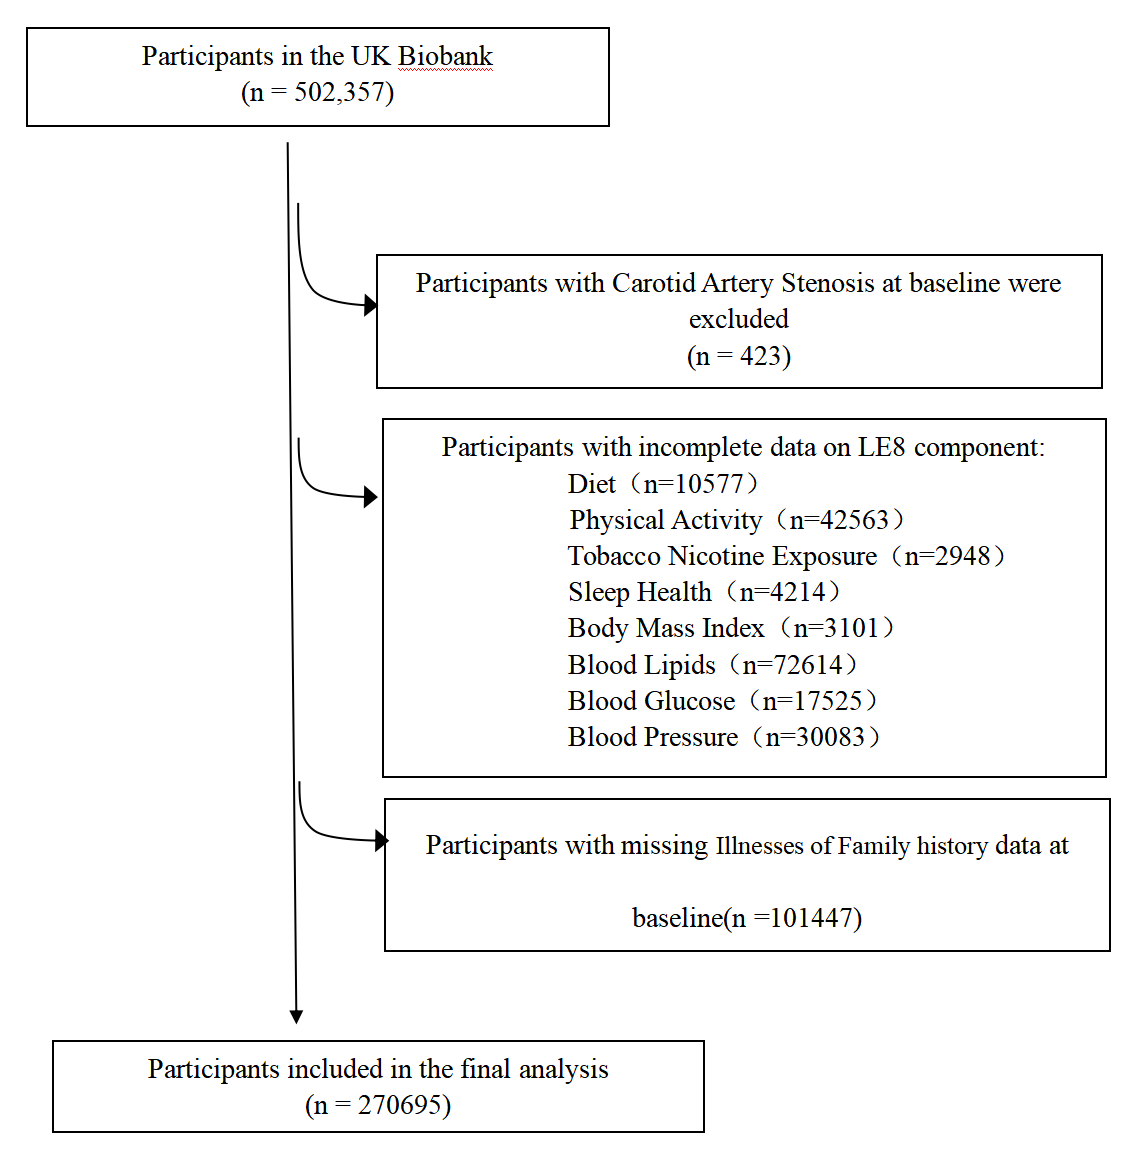


**Figure S1.** Selection of study participants in the UK Biobank cohort.

**A** **B**


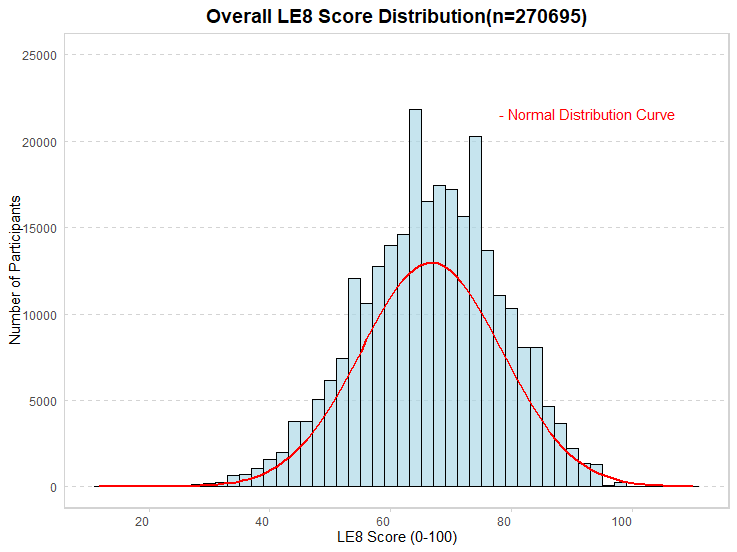

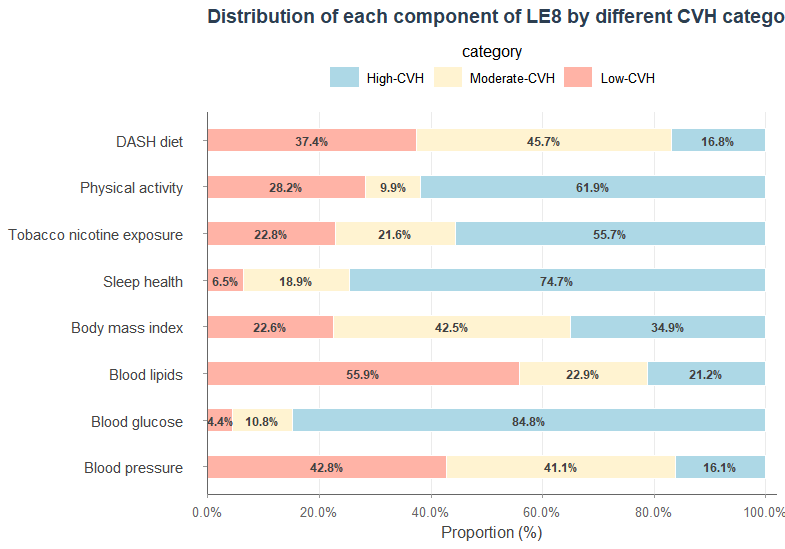


**Figure S2.** Distribution of Life’s Essential 8 (LE8) Overall Score(A) and Individual

Components(B）in 270,695UK Biobank Participants

**
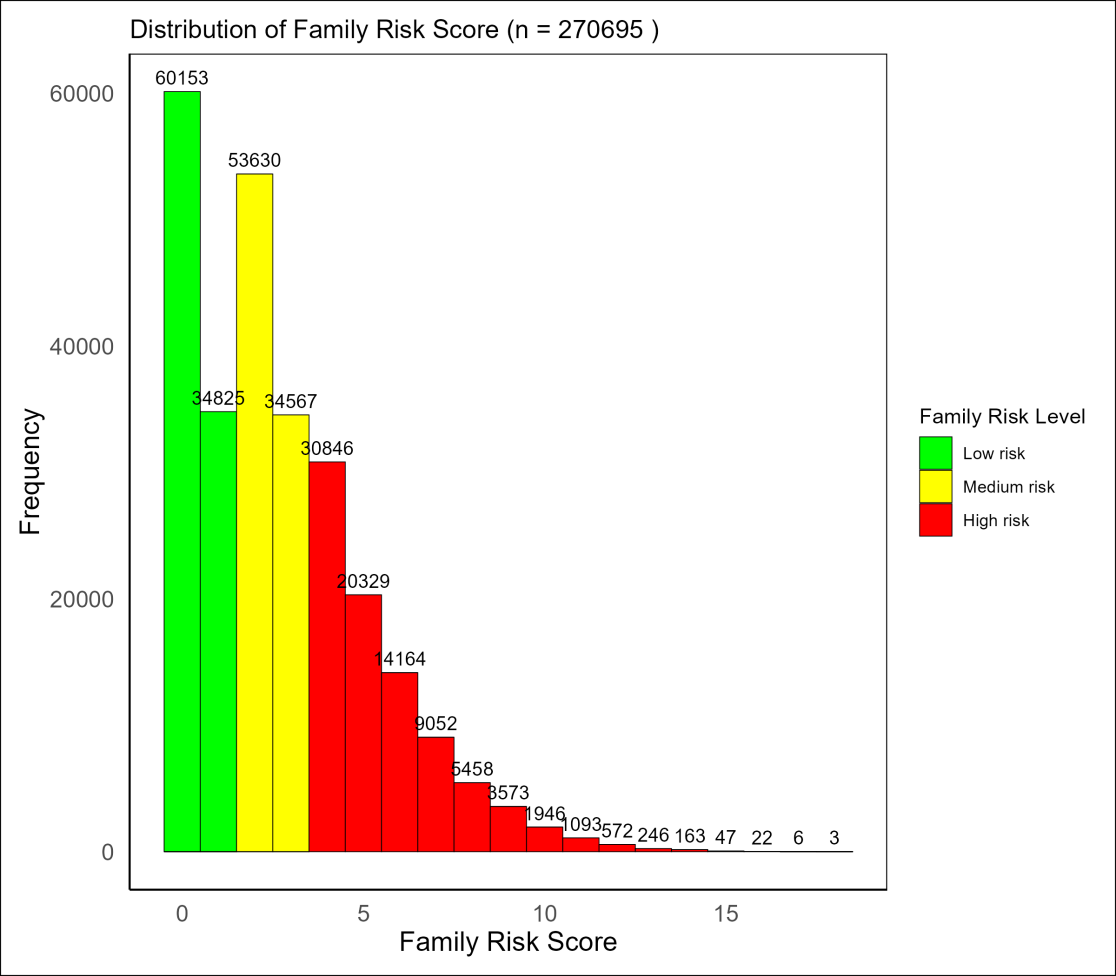
**

**Figure S3.**Frequency of Family Risk Scores by Risk Category


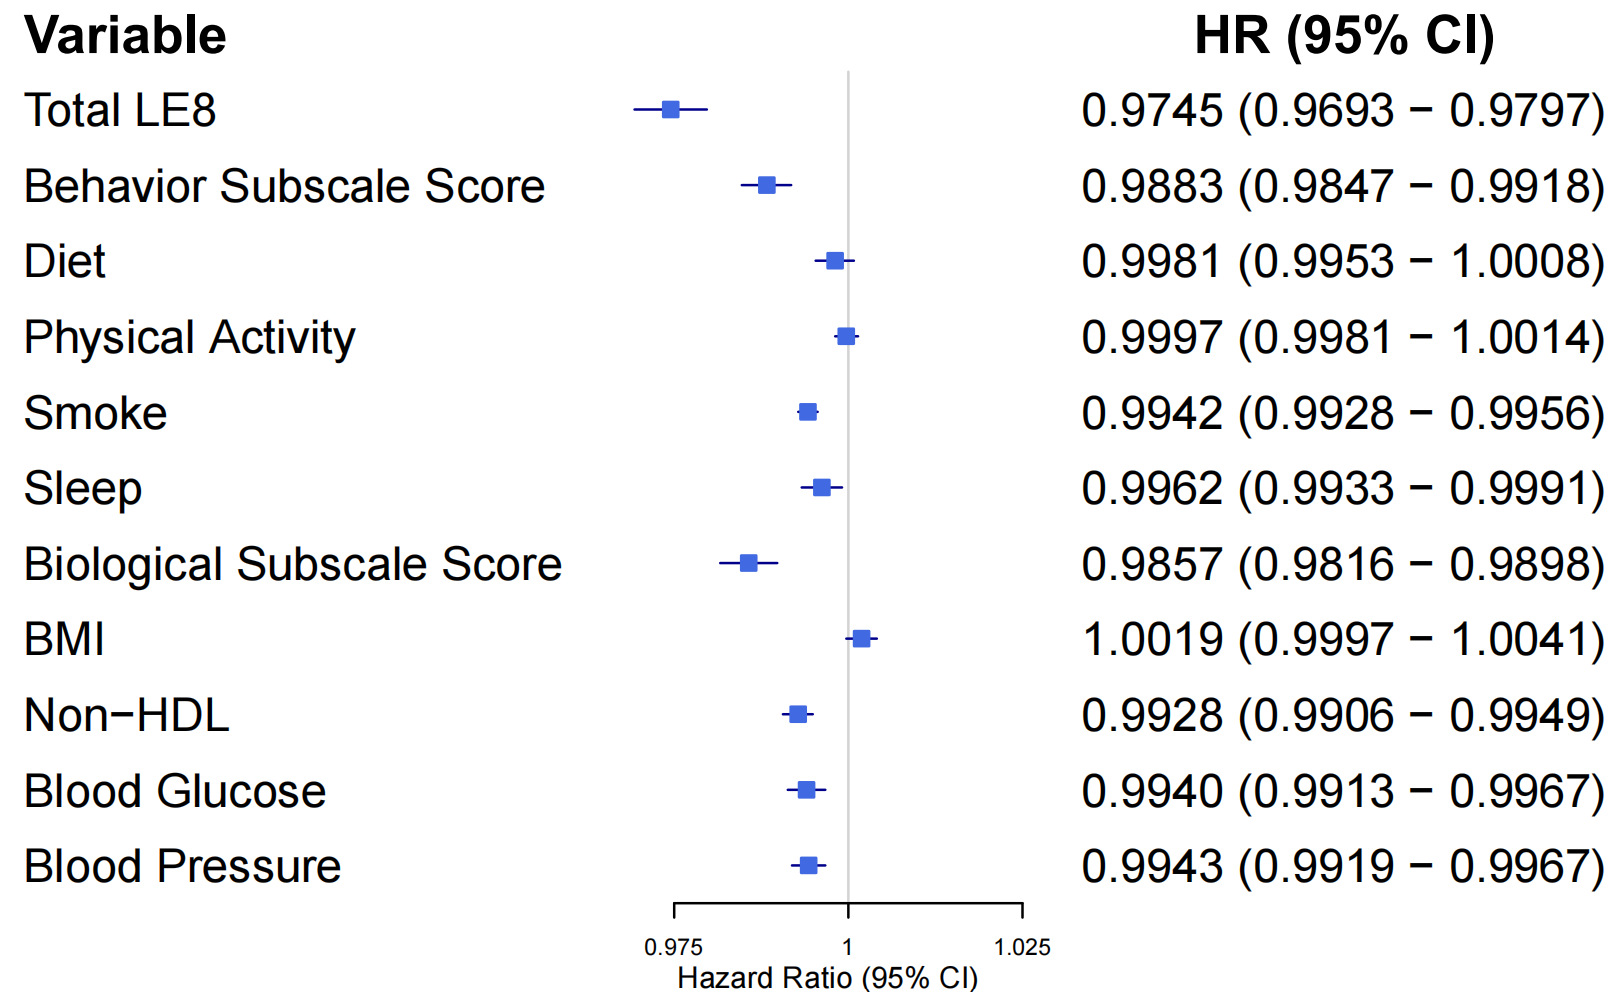


**Figure S4.**Association of total LE8 score, behavior subscale score and biological subscale score with CAS: Hazard Ratios and

95% Confidence Intervals.

**
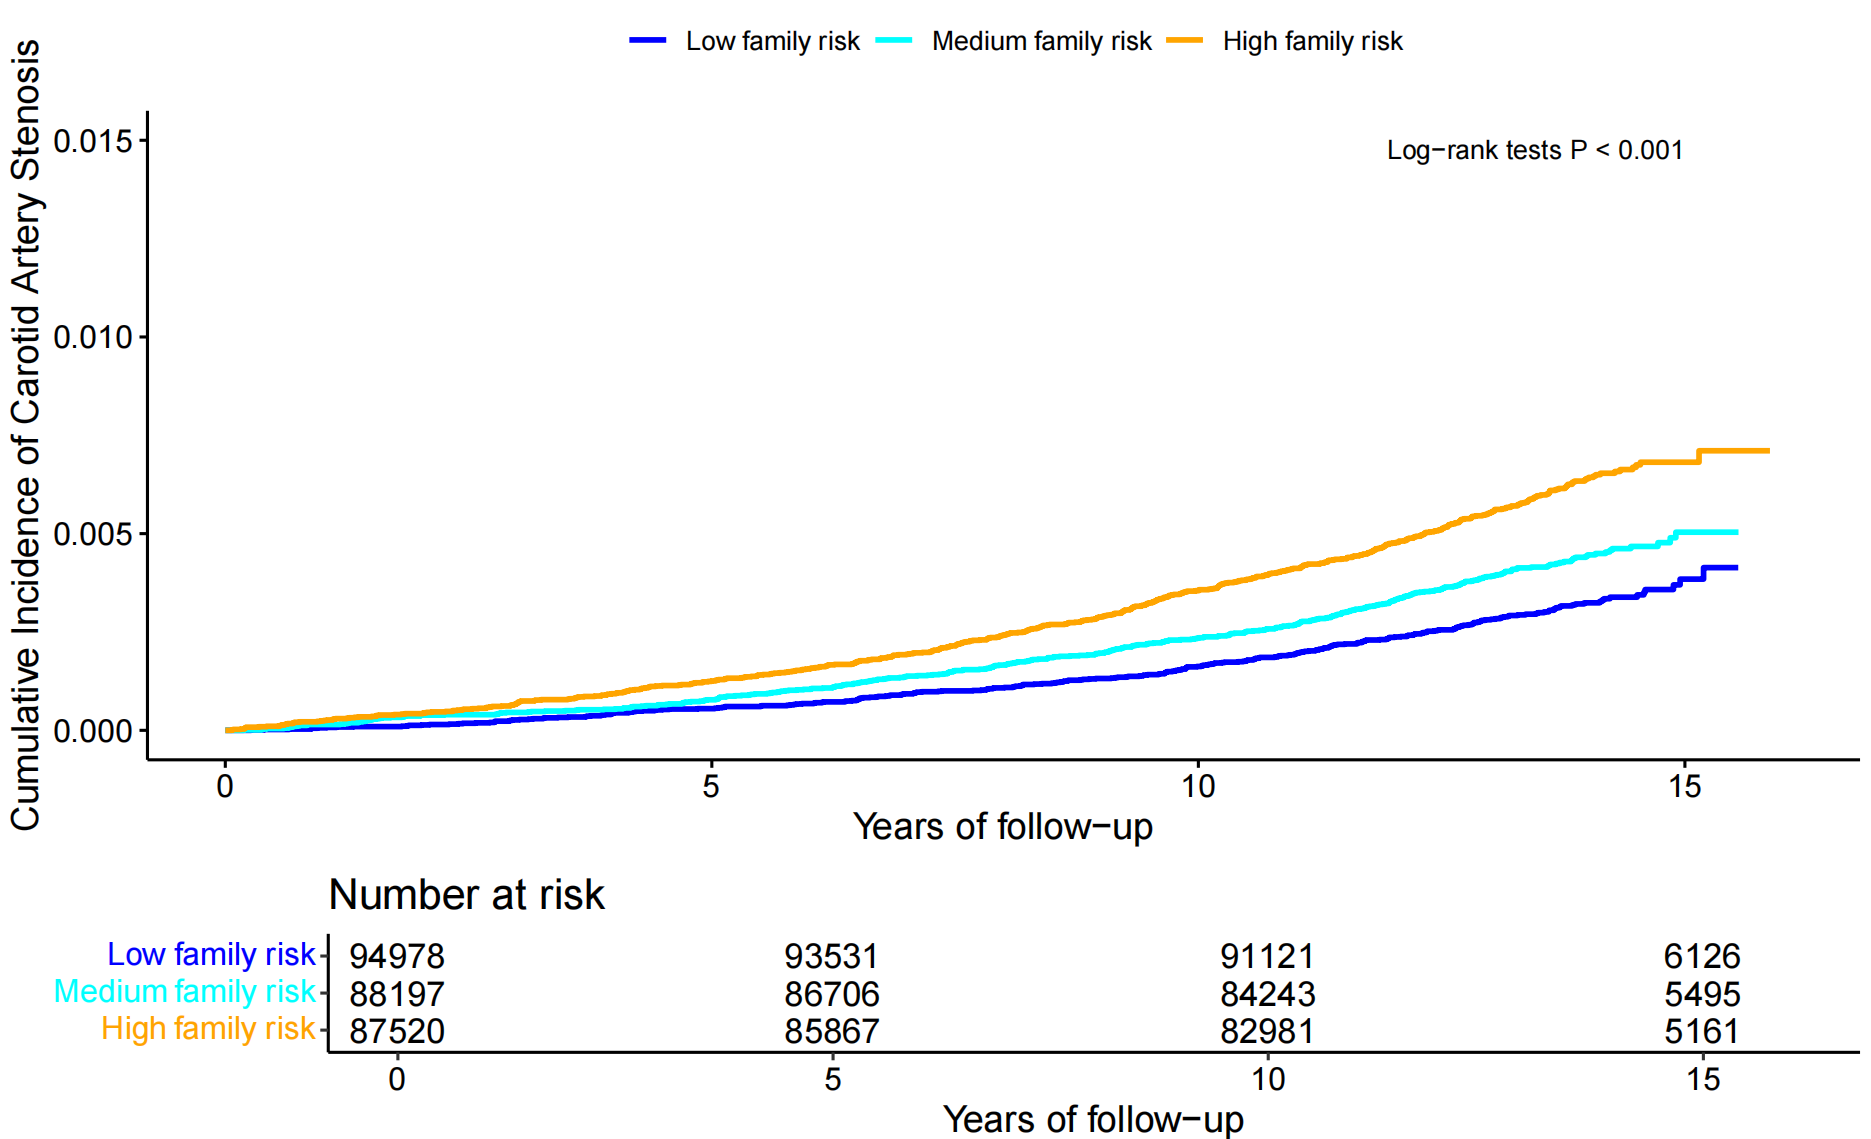
**

**Figure S5.**Crude cumulative incidence of CAS by different family risk level . CAS, Carotid Artery Stenosis;
